# Supplementary material
Source: MDPI journal article supplement (https://www.mdpi.com/1999-4907/15/3/546)
Supplement: s1 [file s1]

### ***Supplementary materials***

**Table S1.** List of forest land types of WMNP

| Forest land types     | Area(hm <sup>2</sup> ) | Proportion in land area (%) |
|-----------------------|------------------------|-----------------------------|
| Arbor woodland        | 82067.42               | 81.951                      |
| Shrub woodland        | 4216.24                | 4.210                       |
| Bamboo woodland       | 12374.31               | 12.357                      |
| Unforested land       | 57.33                  | 0.057                       |
| Cut-over land         | 89.66                  | 0.090                       |
| Suitable for woodland | 366.42                 | 0.366                       |
| Nursery field         | 2.07                   | 0.002                       |
| Thinning woodland     | 0.54                   | 0.001                       |
| Non-forestry land     | 967.53                 | 0.966                       |
| Total                 | 100141.52              | 100                         |

**Table S2.** Contribution of different dominant tree species in the tree layer to the total carbon storage of WMNP

| Dominant tree species          | Area<br>(hm <sup>2</sup> ) | Biomass<br>(10 <sup>3</sup> t) | Carbon<br>storage<br>(10 <sup>3</sup> t C) | Carbon<br>density<br>(t C·hm <sup>-2</sup> ) | Percentage to<br>total carbon<br>storage<br>(%) |
|--------------------------------|----------------------------|--------------------------------|--------------------------------------------|----------------------------------------------|-------------------------------------------------|
| <i>Pinus massoniana</i>        | 27404.32                   | 2615.81                        | 1307.9                                     | 47.73                                        | 26.96%                                          |
| <i>Pinus taiwanensis</i>       | 179.87                     | 13.79                          | 6.89                                       | 38.32                                        | 0.14%                                           |
| <i>Cunninghamia lanceolate</i> | 5319.54                    | 535.21                         | 267.61                                     | 50.31                                        | 5.52%                                           |
| Broad-leaved hardwood          | 49037.68                   | 5620.62                        | 2810.31                                    | 57.31                                        | 57.93%                                          |
| Broad-leaved softwood          | 44.78                      | 4.09                           | 2.05                                       | 45.78                                        | 0.04%                                           |
| Non-dominant tree species      | 15911.23                   | 912.35                         | 456.17                                     | 26.67                                        | 9.40%                                           |
| Total                          | 97897.42                   | 9701.87                        | 4850.93                                    |                                              | 100.00%                                         |

**Table S3.** Model parameters for biomass conversion and storage of main dominant tree species

| Dominant tree species          | <i>a</i> | <i>b</i> |
|--------------------------------|----------|----------|
| <i>Pinus massoniana</i>        | 0.510    | 1.045    |
| <i>Pinus taiwanensis</i>       | 0.517    | 33.238   |
| <i>Cunninghamia lanceolata</i> | 0.400    | 22.541   |
| Broad-leaved hardwood          | 0.756    | 8.310    |
| Broad-leaved softwood          | 0.475    | 30.603   |

**Table S4.** Correlation coefficient of influencing factors to the forest carbon storage in 2017

| Effectors | Slope<br>length( $x_1$ ) | Site quality<br>grade( $x_2$ ) | Dominant tree<br>species( $x_3$ ) | Origin<br>( $x_4$ ) | Age<br>group<br>( $x_5$ ) | Elevation<br>( $x_6$ ) | Forest carbon<br>storage<br>( $y$ ) |
|-----------|--------------------------|--------------------------------|-----------------------------------|---------------------|---------------------------|------------------------|-------------------------------------|
| $x_1$     | 1.0000                   |                                |                                   |                     |                           |                        |                                     |
| $x_2$     | -0.1682                  | 1.0000                         |                                   |                     |                           |                        |                                     |
| $x_3$     | -0.2396                  | -0.0458                        | 1.0000                            |                     |                           |                        |                                     |
| $x_4$     | -0.2779                  | 0.0549                         | 0.5175                            | 1.0000              |                           |                        |                                     |
| $x_5$     | -0.2851                  | 0.0106                         | 0.7896                            | 0.3871              | 1.0000                    |                        |                                     |
| $x_6$     | -0.4448                  | 0.1077                         | 0.3158                            | 0.4646              | 0.3663                    | 1.0000                 |                                     |
| $y$       | -0.2831                  | 0.0970                         | 0.7292                            | 0.4869              | 0.6387                    | 0.3555                 | 1.0000                              |

**Table S5.** Correlation coefficient of influencing factors to the forest carbon storage in 2020

| Effectors             | Aspect<br>( <i>z</i> <sub>1</sub> ) | Dominant tree<br>species<br>( <i>z</i> <sub>2</sub> ) | Age group<br>( <i>z</i> <sub>3</sub> ) | Elevation<br>( <i>z</i> <sub>4</sub> ) | Forest carbon<br>storage<br>( <i>y</i> ) |
|-----------------------|-------------------------------------|-------------------------------------------------------|----------------------------------------|----------------------------------------|------------------------------------------|
| <i>z</i> <sub>1</sub> | 1.0000                              |                                                       |                                        |                                        |                                          |
| <i>z</i> <sub>2</sub> | -0.1265                             | 1.0000                                                |                                        |                                        |                                          |
| <i>z</i> <sub>3</sub> | -0.0833                             | 0.8694                                                | 1.0000                                 |                                        |                                          |
| <i>z</i> <sub>4</sub> | -0.1092                             | 0.4554                                                | 0.4490                                 | 1.0000                                 |                                          |
| <i>y</i>              | -0.0359                             | 0.1797                                                | 0.1688                                 | 0.1160                                 | 1.0000                                   |

**Table S6.** Carbon stock of different ages group of forest stands in 2017 and 2020

| Year | Age group          | Area (hm <sup>2</sup> ) | Biomass<br>(10 <sup>3</sup> t) | Carbon storage<br>(10 <sup>3</sup> t C) | Carbon density<br>(t C·hm <sup>-2</sup> ) |
|------|--------------------|-------------------------|--------------------------------|-----------------------------------------|-------------------------------------------|
| 2017 | Young forest       | 424.28                  | 25.85                          | 12.92                                   | 30.46                                     |
|      | Middle-age forest  | 3634.28                 | 275.47                         | 137.74                                  | 37.90                                     |
|      | Near-mature forest | 5350.90                 | 441.18                         | 220.59                                  | 41.22                                     |
|      | Mature forest      | 32267.63                | 3312.74                        | 1656.37                                 | 51.33                                     |
|      | Overmature forest  | 36066.96                | 4271.89                        | 2135.95                                 | 59.22                                     |
|      | Total              | 77744.05                | 8327.14                        | 4163.57                                 |                                           |
| 2020 | Young forest       | 670.27                  | 53.01                          | 26.51                                   | 39.55                                     |
|      | Middle-age forest  | 3913.34                 | 362.94                         | 181.47                                  | 46.37                                     |
|      | Near-mature forest | 5306.22                 | 509.40                         | 254.70                                  | 48.00                                     |
|      | Mature forest      | 33343.20                | 3405.49                        | 1702.74                                 | 51.07                                     |
|      | Overmature forest  | 38753.16                | 4458.68                        | 2229.34                                 | 57.53                                     |
|      | Total              | 81986.19                | 8789.52                        | 4394.76                                 |                                           |
